1 **Characterisation of cefotaxime-resistant urinary *Escherichia coli* from primary care in**  
2 **South-West England 2017-2018.**

3

4 Jacqueline Findlay<sup>1</sup>, Virginia C. Gould<sup>1</sup>, Paul North<sup>2</sup>, Karen E. Bowker<sup>2</sup>, O. Martin Williams<sup>2</sup>,  
5 Alasdair P. MacGowan<sup>2</sup>, Matthew B. Avison<sup>1\*</sup>

6

7 <sup>1</sup>School of Cellular & Molecular Medicine, Biomedical Sciences Building, University of  
8 Bristol, University Walk, Bristol, UK.

9 <sup>2</sup>Department of Infection Sciences, Severn Infection Partnership, Southmead Hospital,  
10 Bristol, United Kingdom.

11

12

13

14

15

16

17

18

19 \*Corresponding author:

20 bimba@bristol.ac.uk.

21

22

23 Running heading: Cefotaxime-resistant urinary *E. coli*

24 **Abstract**

25 **Objectives:** Third-generation cephalosporin-resistant *Escherichia coli* from community-  
26 acquired urinary tract infections (UTI) have been increasingly reported worldwide. In this  
27 study we sought to determine and characterise the mechanisms of cefotaxime-resistance  
28 (CTX-R) employed by urinary *E. coli* obtained from primary care over a 12-month period, in  
29 Bristol and surrounding counties in the South West of England.

30 **Methods:** Cephalexin resistant (Ceph-R) *E. coli* isolates were identified directly from general  
31 practice (GP) referred urine samples using disc susceptibility testing as per standard  
32 diagnostic procedures. CTX-R was determined by subsequent plating onto MIC breakpoint  
33 plates.  $\beta$ -Lactamase genes were detected by PCR. Whole Genome Sequencing (WGS) was  
34 performed on 225 urinary isolates and analyses were performed using the Centre for  
35 Genomic Epidemiology platform. Patient information provided by the referring GPs was  
36 reviewed.

37 **Results:** During the study period, Ceph-R *E. coli* (n=900) were obtained directly from urines  
38 from 146 GPs. Seventy-percent (626/900) of isolates were CTX-R. WGS of 225 non-  
39 duplicate isolates identified that the most common mechanism of CTX-R was *bla*<sub>CTX-M</sub>  
40 carriage (185/225; 82.2%), predominantly *bla*<sub>CTX-M-15</sub> (114/185; 61.6%), followed by carriage  
41 of plasmid mediated AmpCs (pAmpCs) (17/225; 7.6%), ESBL *bla*<sub>SHV</sub> variants (6/225; 2.7%),  
42 AmpC hyperproduction (13/225; 5.8%), or a combination of both *bla*<sub>CTX-M</sub> and pAmpC  
43 carriage (4/225; 1.8%). Forty-four sequence types (STs) were identified with ST131  
44 representing 101/225 (45.0%) of sequenced isolates, within which the *bla*<sub>CTX-M-15</sub>-positive  
45 clade C2 was dominant (54/101; 53.5%). Ciprofloxacin-resistance (CIP-R) was observed in  
46 128/225 (56.9%) of sequenced CTX-R isolates – predominantly associated with  
47 fluoroquinolone-resistant clones ST131 and ST1193.

48 **Conclusions:** Most Ceph-R urinary *E. coli*s were CTX-R, predominantly caused by *bla*<sub>CTX-M</sub>  
49 carriage. There was a clear correlation between CTX-R and CIP-R, largely attributable to the

50 dominance of the high-risk pandemic clones, ST131 and ST1193 in this study. This localised  
51 epidemiological data provides greater resolution than regional data and can be valuable for  
52 informing treatment choices in the primary care setting.

53

54

55

56

57

58

59

60

61

62

63

64

65

66

67

68

69

70

71

## 72 Introduction

73 *Escherichia coli* that are resistant to  $\beta$ -lactam antibiotics, particularly to cephalosporins,  
74 represent a major global public health concern. Third-generation cephalosporins (3GCs),  
75 such as cefotaxime, are used across the world to treat infections caused by *E. coli* (e.g.  
76 urinary tract [UTIs], bloodstream and intra-abdominal infections) and subsequently the  
77 emergence of resistance is particularly worrisome.<sup>1</sup> Resistance to 3GCs in *E. coli* can be  
78 caused by multiple mechanisms including chromosomally encoded AmpC  $\beta$ -lactamase  
79 hyperproduction, and may involve increased efflux, and reduced outer membrane  
80 permeability, but is predominantly attributed to the spread of plasmid-mediated AmpC  
81 (pAmpC, e.g. *bla*<sub>CMY</sub>) or extended-spectrum  $\beta$ -lactamases (ESBLs, e.g. *bla*<sub>CTX-M</sub>).<sup>2</sup> *E. coli*  
82 which harbour ESBLs are often co-resistant to multiple antibiotic classes and subsequently  
83 the treatment options for such infections may be limited.<sup>3</sup>

84 UTIs are the most common bacterial infection type in both primary and hospital care settings  
85 in the developed world,<sup>4</sup> and are associated with considerable morbidity.<sup>5</sup> Previous studies  
86 of community-acquired UTIs in several mainland European countries found that *E. coli* were  
87 the most commonly isolated uropathogen, accounting for over half of all isolates (53.3-  
88 76.7%).<sup>6-8</sup> The incidence of community-acquired UTI in the UK is difficult to determine since  
89 such infections are not reportable and most are diagnosed and treated in a primary care  
90 setting, with diagnosis often based solely upon patient symptoms rather than a positive urine  
91 culture. Community-acquired UTIs are most often treated empirically and subsequently local  
92 epidemiological data is useful for informing treatment choice. Treatment failure for  
93 community-acquired UTIs, particularly in immune-compromised patients, increases the risk  
94 of the infection spreading to other sites including the bloodstream, with grave  
95 consequences.<sup>9, 10</sup>

96 *E. coli* sequence types (STs) belonging to phylogroups B2 (STs 73, 95 and 131) and D  
97 (ST69) have been reported to be major causes of both UTIs and bloodstream infections  
98 (BSIs) in the UK.<sup>11</sup> Since its initial description in 2008, numerous studies have shown that

99 the multidrug-resistant pandemic clone, ST131, is a major cause of UTI globally.<sup>12-14</sup> The  
100 ST131 clonal group can be broken down by population genetics into three clades based on  
101 their association with particular *fimH* types: *A/fimH41*, *B/fimH22*, and *C/fimH30*.<sup>15</sup> Clade C  
102 can be further broken down into four subclades; C1 – not usually associated with ESBL  
103 carriage but typically fluoroquinolone resistant (FQ-R), C1-M27 and C1-nM27 – both  
104 associated with *bla*<sub>CTX-M-27</sub> carriage and FQ-R, and C2 (also known as H30Rx) – associated  
105 with *bla*<sub>CTX-M-15</sub> carriage and FQ-R.<sup>15, 16</sup> Studies have suggested that the global dominance of  
106 ESBL-positive ST131 is, in part, due to its increased virulence potential over its non-ST131  
107 ESBL-positive counterparts.<sup>17, 18</sup>

108 This study sought to use whole genome sequencing (WGS) to characterise the population  
109 structure and determine the mechanisms of CTX-R employed by urinary *E. coli* isolates  
110 referred from general practice in Bristol and surrounding counties in the South-West of  
111 England serving a population of approximately 1.2 million people.

112

## 113 **Materials and Methods**

### 114 **Bacterial isolates, identification and susceptibility testing**

115 Cephalixin-resistant (Ceph-R) urinary *E. coli* isolates were obtained from routine urine  
116 microbiology at Severn Infection Partnership Southmead Hospital. Urine samples were  
117 submitted between Sept 2017 and Aug 2018, from 146 general practices located throughout  
118 Bristol and including coverage in Gloucestershire, Somerset and Wiltshire.

119 Bacterial identification was carried out using BD™ CHROMagar™ Orientation Medium  
120 chromogenic agar (BD, GmbH, Heidelberg, Germany).

121 Antibiotic susceptibilities were performed by disc testing or, in the case of colistin, by broth  
122 microdilution and interpreted according to EUCAST guidelines.<sup>19</sup> Ceph-R isolates were  
123 subcultured onto agar plates containing 2 mg/L cefotaxime (CTX) and isolates that were

124 positive for growth were deemed CTX-resistant (CTX-R), and taken forward for further  
125 testing.

### 126 **Screening for $\beta$ -lactamase genes**

127 Two multiplex PCRs were performed to screen for  $\beta$ -lactamase genes. The first to detect  
128 *bla*<sub>CTX-M</sub> groups as previously described,<sup>20</sup> and the second to detect the following additional  
129  $\beta$ -lactamase genes; *bla*<sub>CMY-2</sub> type, *bla*<sub>DHA</sub>, *bla*<sub>SHV</sub>, *bla*<sub>TEM</sub>, *bla*<sub>OXA-1</sub>, using the primers listed in  
130 Table S1.

### 131 **WGS and analyses**

132 WGS was performed by MicrobesNG (<https://microbesng.uk/>) on a HiSeq 2500 instrument  
133 (Illumina, San Diego, CA, USA) using 2x250 bp paired end reads. Reads were trimmed  
134 using Trimmomatic,<sup>21</sup> assembled into contigs using SPAdes<sup>22</sup> 3.13.0  
135 (<http://cab.spbu.ru/software/spades/>) and contigs were annotated using Prokka.<sup>23</sup>  
136 Resistance genes, plasmid replicon types, sequence types and *fim* types were assigned  
137 using the ResFinder,<sup>24</sup> PlasmidFinder,<sup>25</sup> MLST<sup>26</sup> 2.0 and FimTyper on the Center for  
138 Genomic Epidemiology (<http://www.genomicepidemiology.org/>) platform.

139 ST131 clades were identified by resistance gene carriage and *fimH* type, and in the case of  
140 clade C1-M27, by the presence of the prophage region M27PP1 (CP006632)<sup>16</sup> through  
141 sequence alignment using progressive Mauve alignment software.<sup>27</sup>

142 MLST and resistance gene data were analysed to produce a minimum spanning tree using  
143 Bionumerics software v7.6 (Applied Maths, Sint-Martens-Latem, Belgium).

144 Plasmid pUB\_DHA-1 was sequenced to closure and submitted to GenBank with accession  
145 number MK048477. Reads were mapped using Geneious Prime 2019.1.3  
146 (<https://www.geneious.com>).

### 147 **Plasmid Transformation**

148 Transformation of plasmid extractions from isolates encoding *mcr-1* and *bla*<sub>OXA-244</sub> were  
149 attempted by electroporation using *E. coli* DH5 alpha as a recipient. Transformants were  
150 selected, respectively, on LB agar containing 0.5 mg/L colistin, or containing 100 mg/L  
151 ampicillin with a 10 µg ertapenem disc being placed on the agar surface (Oxoid Ltd,  
152 Basingstoke, UK). Transformants were confirmed by PCR (Table S1).

### 153 **Analysis of patient demographic information**

154 Limited, non-identifiable patient information was obtained from the request forms sent with  
155 submissions from referring GP practices.

156

## 157 **Results and Discussion**

### 158 **Patient demographics and antimicrobial susceptibilities**

159 Nine hundred Ceph-R urinary *E. coli* isolates, obtained from primary care in Bristol and  
160 surrounding areas, were collected during the period of the study. Most isolates were  
161 obtained from female patients (721/900; 80.1%) and the average patient age was 63.2  
162 years. Seventy-percent (626/900) were CTX-R and within these, most were again from  
163 females (507/626; 81.0%) with an average patient age of 63.6 years.

### 164 **β-Lactamase genes of interest detected by PCR in CTX-R isolates**

165 Table 1 indicates the number of CTX-R isolates carrying each β-lactamase genes of interest  
166 (GOIs; *bla*<sub>CTX-Ms</sub>, *bla*<sub>CMY</sub>, *bla*<sub>DHA</sub> or *bla*<sub>SHV</sub>). *bla*<sub>CTX-Ms</sub> were by far the prevalent gene group,  
167 found in 571/626 (91.2%) of isolates. Within these *bla*<sub>CTX-M-G1</sub> were most common (421/626)  
168 followed by *bla*<sub>CTX-M-G9</sub> (149/626) and *bla*<sub>CTX-M-G8</sub> (one isolate). pAmpCs *bla*<sub>CMY</sub> and *bla*<sub>DHA</sub>  
169 were found in 13 (3 alongside *bla*<sub>CTX-M-G1</sub>) and 17 (4 alongside *bla*<sub>CTX-M-G1</sub>) isolates  
170 respectively. *bla*<sub>SHV</sub> was found in 11 (3 alongside *bla*<sub>CTX-M-G1</sub>) isolates and the remaining 24  
171 isolates harboured none of the GOIs as detected by PCR.

### 172 **Whole Genome Sequencing (WGS) analyses**

### 173 **GOI variants and STs**

174 Two-hundred and twenty-five isolates, chosen to be representative of resistance gene  
175 carriage (as previously determined by PCR) and patient demographics (age, sex) obtained  
176 throughout the entire study period, were selected for WGS. Within these, 44 sequence types  
177 (STs) were identified, with numbers of isolates ranging from 1 to 101 representatives. ST131  
178 was dominant (n=101), followed by STs 69 (n=15), 73 (n=15), 38 (n=13), 1193 (n=11), and  
179 10 (n=8). The remaining 38 STs had 1 to 4 representative isolates (Figure 1).

180 CTX-R GOIs were identified in all but thirteen isolates (212/225; 94.2%). Eighty-four percent  
181 (189/225) of isolates harboured one of seven *bla*<sub>CTX-M</sub> gene variants (Table 2). Carriage of  
182 *bla*<sub>CTX-M-15</sub> was the most common CTX-R mechanism identified (118/189) followed by *bla*<sub>CTX-</sub>  
183 *M-27* (44/189) and *bla*<sub>CTX-M-14</sub> (10/189). Amongst the non-CTX-M GOIs, four *bla*<sub>CMY</sub> variants  
184 were identified; *bla*<sub>CMY-2</sub> (n=7), *bla*<sub>CMY-4</sub> (n=1), *bla*<sub>CMY-42</sub> (n=2) and *bla*<sub>CMY-60</sub> (n=3; all three  
185 being co-carried alongside *bla*<sub>CTX-M-15</sub>), as well as *bla*<sub>DHA-1</sub> (n=8; one alongside *bla*<sub>CTX-M-15</sub>) and  
186 *bla*<sub>SHV-12</sub> (n=6). The narrow spectrum β-lactamases *bla*<sub>OXA-1</sub>, *bla*<sub>TEM-1</sub> and inhibitor-resistant  
187 variant *bla*<sub>TEM-33</sub> were found in 53, 82, and one isolate respectively.

### 188 **AmpC-hyperproducing isolates**

189 All thirteen (5.8%) sequenced isolates, where no CTX-R GOI could be identified, were  
190 presumed to be chromosomal AmpC β-lactamase hyperproducers because they carry  
191 mutations within the *ampC* promoter/attenuator region previously seen in confirmed AmpC  
192 hyperproducers (Table 3).<sup>28, 29</sup> These represented nine different STs, each having one  
193 representative, with the exceptions of the STs 75 and 200 of which there were three  
194 representatives each (Table S2). This indicates a lack of dominant clones in AmpC  
195 hyperproducers identified in this study. If we go on to assume that the 24 isolates negative  
196 for GOIs by PCR are AmpC-hyperproducers, as was found with the thirteen representative  
197 sequenced isolates, then 3.8% of the isolates in this study could be classed as AmpC-



198 hyperproducers. Additionally, one *bla*<sub>CTX-M-15</sub>-positive isolate was found to also harbour *ampC*  
199 promoter changes associated with hyperproduction.

## 200 **Characterisation of ST131 Isolates**

### 201 **ESBLs and clades**

202 One hundred and one ST131 isolates harboured the following CTX-R mechanisms/alleles;  
203 *bla*<sub>CTX-M-1</sub> (n=1), *bla*<sub>CTX-M-14</sub> (n=4), *bla*<sub>CTX-M-15</sub> (n=61), *bla*<sub>CTX-M-15</sub>/*bla*<sub>CMY-60</sub> (n=1), *bla*<sub>CTX-M-27</sub>  
204 (n=33). The isolates were broken down into their respective clades (Table 4); ST131-C2 was  
205 dominant (54/101; 53.5%) followed by C1-M27 (M27) (23/101; 22.8%), A (11/101; 10.9%),  
206 C1-nM27 (5/101; 5.0%), one clade B, and seven isolates were unclassified. Eighty-eight  
207 percent (89/101) of isolates, and notably all clade C2 isolates, were CIP-R as is a typical  
208 characteristic of this lineage. Two non-ST131 members of the ST131 complex, both of which  
209 were *bla*<sub>CTX-M-15</sub>-positive ST8313 isolates (a *fumC* single locus variant (SLV) of ST131), also  
210 harboured the same chromosomal FQ-R associated mutations in *gyrA*, *parC* and *parE* as  
211 are associated with ST131/C2 – suggesting this ST may be ST131/C2 derived. Previous  
212 studies have highlighted the dominance of ST131 and particularly the clade C2/H30Rx on a  
213 worldwide scale.<sup>13, 14</sup> Since its initial description in 2008 in isolates from 3 continents,<sup>12, 13</sup>  
214 ST131 has been reported across all inhabited continents.<sup>15</sup> The recently described C1  
215 subclade, C1-M27, as characterised by the presence of a 11,894 bp prophage-like genomic  
216 island M27PP1, was initially described in Japan in 2016 and has been reported in countries  
217 in at least three continents: Europe, Asia and North America, so far.<sup>16</sup> The presence of C1-  
218 M27 isolates in this study indicates the expansion of this particular ST131 sublineage into  
219 the UK, similarly to that which has been reported from countries in mainland Europe.<sup>30</sup>

### 220 **Virotypes**

221 ST131 has been reported in previous studies to be a highly virulent clone, exhibiting lethality  
222 in mouse sepsis models.<sup>18, 31</sup> Virotypes of all 101 ST131 isolates were determined as  
223 previously described.<sup>18, 32</sup> Virotype C was most common, represented by 38/101 (37.6%) of

224 ST131 isolates and predominantly associated with *bla*<sub>CTX-M-27</sub> (28/38 isolates) across clades  
225 A (n=3), C1-M27 (n=22), C1-nM27 (n=4), and one isolate belonged to an unclassified clade.  
226 All *bla*<sub>CTX-M-27</sub>-positive isolates belonged to virotype C, with the exception of one isolate for  
227 which a virotype could not be assigned. The association between virotype C and *bla*<sub>CTX-M-27</sub>  
228 carriage is in agreement with a recent study conducted in France.<sup>33</sup> Twenty-five isolates  
229 belonged to virotype A, all of which except one harboured *bla*<sub>CTX-M-15</sub>. The remaining 38  
230 isolates belonged to either virotype B (n=1), D (n=1), G (n=8), or were unknown virotypes  
231 (n=28).

### 232 **Genetic context of ESBLs/pAmpC genes**

233 Despite the limitations of short read sequencing, by examining the contigs on which GOIs  
234 were located, we were able to determine the chromosomal or plasmid environments of  
235 ESBLs/pAmpC genes in 85/225 isolates. Forty CTX-M genes, of variants *bla*<sub>CTX-M-14</sub> (n=3)  
236 and *bla*<sub>CTX-M-15</sub> (n=37), were found to be located on the chromosome. These were found in  
237 11 STs with STs 131 (n=11) and 73 (n=10) being the most represented. Whilst the CTX-M  
238 genetic environments were diverse in ST131, in ST73 9/10 isolates harboured the gene in  
239 the same genomic location, suggesting a high degree of clonality within this ST. The  
240 remaining GOIs were found to be located within a relatively diverse range of plasmids and  
241 across multiple STs. Interestingly all six DHA-1-harboring isolates were found to harbour a  
242 similar IncI1 plasmid which was sequenced to closure during this study, pUB\_DHA-1. Read  
243 mapping analyses showed that all six isolates exhibited 95-100% coverage and 98-100%  
244 identity against pUB\_DHA-1.

### 245 **Other important resistance genes found by WGS**

246 Interestingly one ST69 CMY-2-producing isolate was also found to harbour *mcr-1*.  
247 Susceptibility testing, performed by broth microdilution, revealed that the MIC of colistin  
248 against this isolate is 8 mg/L and so it is colistin resistant. Attempts at transformation of *E.*  
249 *coli* DH5 alpha using plasmid DNA extracted from this isolate were successful indicating that

250 *mcr-1* is plasmid encoded. Analysis of the genetic environment of *mcr-1* found that it is  
251 encoded on an IncI2 plasmid of approximately 62 kb and it lacks the upstream IS*ApI1*  
252 element that was described in the initial discovery of *mcr-1* in China.<sup>34</sup> The plasmid itself  
253 does not encode any additional resistance genes and when subjected to NCBI BLAST  
254 analysis exhibited ~96% similarity to *mcr-1* encoding plasmids found in both China  
255 (pHNGDF93; Genbank Accession Number MF978388) and Taiwan (p5CRE51-MCR-1;  
256 Genbank Accession Number CP021176) from animal and human origins, respectively. Since  
257 initial reports of its discovery in 2015,<sup>34</sup> *mcr-1* has been reported worldwide in clinical *E. coli*  
258 isolates although remains relatively rare.

259 Another isolate, a *bla*<sub>CTX-M-14</sub>-positive ST38, also encoded the *bla*<sub>OXA-48-like</sub> carbapenemase  
260 gene *bla*<sub>OXA-244</sub>.<sup>35</sup> Transformation attempts using plasmid DNA from this isolate were  
261 unsuccessful and so it was concluded that *bla*<sub>OXA-244</sub> is likely to be chromosomally encoded.  
262 Disc susceptibility testing showed that this isolate is resistant to ertapenem but susceptible  
263 to both imipenem and meropenem. The presence of the chromosomally-encoded OXA-48-  
264 like carbapenemase *bla*<sub>OXA-244</sub>, confirms the observations of a previous study, where OXA-  
265 48-like genes were shown to have become embedded in the ST38 chromosome.<sup>36</sup> ST38 is  
266 the most frequent ST associated with OXA-48-like enzymes in the UK.<sup>36</sup>

## 267 **Conclusions**

268 Resistance to 3GCs and FQs in *E. coli* is of increasing concern due to the importance of  
269 these classes of drugs for the treatment of serious infections. As observed in this study and  
270 in line with previous reports globally,<sup>2</sup> the dissemination of successful clones is a major  
271 cause of CTX-R in urinary isolates from primary care in South West England.

272 The correlation between CIP-R and CTX-R highlighted here can be largely attributed to the  
273 dominance of successful clones/clades, namely ST131 and ST1193; the majority of both  
274 harbour chromosomal FQ-R mutations. Through WGS of a subset of isolates we have

275 shown that ST131 clade C2 is dominant and that the recently described ST131 subclade,  
276 C1-M27, is also prevalent despite not previously being described in the UK.

277 This study is the first analysis of CTX-R urinary *E. coli* derived from the community, and  
278 performed in a relatively localised area in South West England and can be useful for  
279 informing patient treatment as well as providing essential data for comparison purposes to  
280 other areas, both within and outwith the UK.

281

## 282 **Acknowledgements**

283 Genome sequencing was provided by MicrobesNG (<http://www.microbesng.uk>), which is  
284 supported by the BBSRC (grant number BB/L024209/1). We are grateful to Aleksandra  
285 Pastuszek, Severn Infection Partnership, Southmead Hospital, for assistance in collecting  
286 the urinary *E. coli* isolates.

## 287 **Funding**

288 This work was funded by grant NE/N01961X/1 to M.B.A. and A.P.McG. from the  
289 Antimicrobial Resistance Cross Council Initiative supported by the seven United Kingdom  
290 research councils.

## 291 **Transparency declaration**

292 None to declare.

293

## 294 **Supplementary data**

295 Tables S1 and S2 are available as supplementary data.

296

297

298 **References**

299

- 300 1. Public Health England. English surveillance programme for antimicrobial utilisation and  
301 resistance (ESPAUR). 2018.  
302 [https://assets.publishing.service.gov.uk/government/uploads/system/uploads/attachment\\_data/file/](https://assets.publishing.service.gov.uk/government/uploads/system/uploads/attachment_data/file/759975/ESPAUR_2018_report.pdf)  
303 [759975/ESPAUR\\_2018\\_report.pdf](https://assets.publishing.service.gov.uk/government/uploads/system/uploads/attachment_data/file/759975/ESPAUR_2018_report.pdf).
- 304 2. Bevan ER, Jones AM, Hawkey PM. Global epidemiology of CTX-M beta-lactamases: temporal  
305 and geographical shifts in genotype. *The Journal of antimicrobial chemotherapy* 2017; **72**: 2145-55.
- 306 3. Morosini MI, Garcia-Castillo M, Coque TM et al. Antibiotic coresistance in extended-  
307 spectrum-beta-lactamase-producing Enterobacteriaceae and in vitro activity of tigecycline.  
308 *Antimicrobial agents and chemotherapy* 2006; **50**: 2695-9.
- 309 4. Nicolle LE. Epidemiology of urinary tract infections. *Clinical Microbiology Newsletter* 2002;  
310 **24**: 135-40.
- 311 5. Foxman B. Epidemiology of urinary tract infections: incidence, morbidity, and economic  
312 costs. *The American journal of medicine* 2002; **113 Suppl 1A**: 5s-13s.
- 313 6. Kahlmeter G, Eco.Sens. An international survey of the antimicrobial susceptibility of  
314 pathogens from uncomplicated urinary tract infections: the ECO.SENS Project. *The Journal of*  
315 *antimicrobial chemotherapy* 2003; **51**: 69-76.
- 316 7. Cordoba G, Holm A, Hansen F et al. Prevalence of antimicrobial resistant Escherichia coli  
317 from patients with suspected urinary tract infection in primary care, Denmark. *BMC infectious*  
318 *diseases* 2017; **17**: 670.
- 319 8. Schito GC, Naber KG, Botto H et al. The ARES study: an international survey on the  
320 antimicrobial resistance of pathogens involved in uncomplicated urinary tract infections.  
321 *International journal of antimicrobial agents* 2009; **34**: 407-13.
- 322 9. Jiao Song AW, Damon Berridge, Ashley Akbari, Meirion Evans, Ronan A Lyons. Risk factors  
323 for Escherichia coli bacteraemia: a population-based case-control study. *The Lancet; Meeting*  
324 *Abstracts* 2017; **Volume 390, Supplement 3, November 2017, Page S85**.
- 325 10. Lishman H, Costelloe C, Hopkins S et al. Exploring the relationship between primary care  
326 antibiotic prescribing for urinary tract infections, Escherichia coli bacteraemia incidence and  
327 antimicrobial resistance: an ecological study. *International journal of antimicrobial agents* 2018; **52**:  
328 790-8.
- 329 11. Doumith M, Day M, Ciesielczuk H et al. Rapid identification of major Escherichia coli  
330 sequence types causing urinary tract and bloodstream infections. *Journal of clinical microbiology*  
331 2015; **53**: 160-6.
- 332 12. Coque TM, Novais A, Carattoli A et al. Dissemination of clonally related Escherichia coli  
333 strains expressing extended-spectrum beta-lactamase CTX-M-15. *Emerging infectious diseases* 2008;  
334 **14**: 195-200.
- 335 13. Nicolas-Chanoine MH, Blanco J, Leflon-Guibout V et al. Intercontinental emergence of  
336 Escherichia coli clone O25:H4-ST131 producing CTX-M-15. *The Journal of antimicrobial*  
337 *chemotherapy* 2008; **61**: 273-81.
- 338 14. Petty NK, Ben Zakour NL, Stanton-Cook M et al. Global dissemination of a multidrug resistant  
339 Escherichia coli clone. *Proceedings of the National Academy of Sciences of the United States of*  
340 *America* 2014; **111**: 5694-9.
- 341 15. Pitout JD, DeVinney R. Escherichia coli ST131: a multidrug-resistant clone primed for global  
342 domination. *F1000Research* 2017; **6**.
- 343 16. Matsumura Y, Pitout JD, Gomi R et al. Global Escherichia coli Sequence Type 131 Clade with  
344 blaCTX-M-27 Gene. *Emerging infectious diseases* 2016; **22**: 1900-7.
- 345 17. Banerjee R, Robicsek A, Kuskowski MA et al. Molecular epidemiology of Escherichia coli  
346 sequence type 131 and its H30 and H30-Rx subclones among extended-spectrum-beta-lactamase-

- 347 positive and -negative E. coli clinical isolates from the Chicago Region, 2007 to 2010. *Antimicrobial*  
348 *agents and chemotherapy* 2013; **57**: 6385-8.
- 349 18. Mora A, Dahbi G, Lopez C et al. Virulence patterns in a murine sepsis model of ST131  
350 *Escherichia coli* clinical isolates belonging to serotypes O25b:H4 and O16:H5 are associated to  
351 specific virotypes. *PLoS one* 2014; **9**: e87025.
- 352 19. EUCAST. Breakpoint tables for interpretation of MICs and zone diameters. Version 8.1.  
353 [http://www.eucast.org/fileadmin/src/media/PDFs/EUCAST\\_files/Breakpoint\\_tables/v\\_8.1\\_Breakpoi](http://www.eucast.org/fileadmin/src/media/PDFs/EUCAST_files/Breakpoint_tables/v_8.1_Breakpoint_Tables.pdf)  
354 [nt\\_Tables.pdf](http://www.eucast.org/fileadmin/src/media/PDFs/EUCAST_files/Breakpoint_tables/v_8.1_Breakpoint_Tables.pdf).
- 355 20. Woodford N, Fagan EJ, Ellington MJ. Multiplex PCR for rapid detection of genes encoding  
356 CTX-M extended-spectrum (beta)-lactamases. *The Journal of antimicrobial chemotherapy* 2006; **57**:  
357 154-5.
- 358 21. Bolger AM, Lohse M, Usadel B. Trimmomatic: a flexible trimmer for Illumina sequence data.  
359 *Bioinformatics (Oxford, England)* 2014; **30**: 2114-20.
- 360 22. Bankevich A, Nurk S, Antipov D et al. SPAdes: a new genome assembly algorithm and its  
361 applications to single-cell sequencing. *Journal of computational biology : a journal of computational*  
362 *molecular cell biology* 2012; **19**: 455-77.
- 363 23. Seemann T. Prokka: rapid prokaryotic genome annotation. *Bioinformatics (Oxford, England)*  
364 2014; **30**: 2068-9.
- 365 24. Zankari E, Hasman H, Cosentino S et al. Identification of acquired antimicrobial resistance  
366 genes. *The Journal of antimicrobial chemotherapy* 2012; **67**: 2640-4.
- 367 25. Carattoli A, Zankari E, Garcia-Fernandez A et al. In silico detection and typing of plasmids  
368 using PlasmidFinder and plasmid multilocus sequence typing. *Antimicrobial agents and*  
369 *chemotherapy* 2014; **58**: 3895-903.
- 370 26. Wirth T, Falush D, Lan R et al. Sex and virulence in *Escherichia coli*: an evolutionary  
371 perspective. *Molecular microbiology* 2006; **60**: 1136-51.
- 372 27. Darling AE, Mau B, Perna NT. progressiveMauve: multiple genome alignment with gene gain,  
373 loss and rearrangement. *PLoS one* 2010; **5**: e11147.
- 374 28. Caroff N, Espaze E, Gautreau D et al. Analysis of the effects of -42 and -32 ampC promoter  
375 mutations in clinical isolates of *Escherichia coli* hyperproducing ampC. *The Journal of antimicrobial*  
376 *chemotherapy* 2000; **45**: 783-8.
- 377 29. Peter-Getzlaff S, Polsfuss S, Poledica M et al. Detection of AmpC beta-lactamase in  
378 *Escherichia coli*: comparison of three phenotypic confirmation assays and genetic analysis. *Journal of*  
379 *clinical microbiology* 2011; **49**: 2924-32.
- 380 30. Merino I, Hernandez-Garcia M, Turrientes MC et al. Emergence of ESBL-producing  
381 *Escherichia coli* ST131-C1-M27 clade colonizing patients in Europe. *The Journal of antimicrobial*  
382 *chemotherapy* 2018.
- 383 31. Clermont O, Lavollay M, Vimont S et al. The CTX-M-15-producing *Escherichia coli* diffusing  
384 clone belongs to a highly virulent B2 phylogenetic subgroup. *The Journal of antimicrobial*  
385 *chemotherapy* 2008; **61**: 1024-8.
- 386 32. Barrios-Villa E, Cortes-Cortes G, Lozano-Zarain P et al. Adherent/invasive *Escherichia coli*  
387 (AIEC) isolates from asymptomatic people: new E. coli ST131 O25:H4/H30-Rx virotypes. *Annals of*  
388 *clinical microbiology and antimicrobials* 2018; **17**: 42.
- 389 33. Birgy A, Levy C, Nicolas-Chanoine MH et al. Emergence and dominance of E. coli ST131 CTX-  
390 M-27 in a community paediatric cohort study: independent host factors and bacterial genetic  
391 determinants. *Antimicrobial agents and chemotherapy* 2019.
- 392 34. Liu YY, Wang Y, Walsh TR et al. Emergence of plasmid-mediated colistin resistance  
393 mechanism MCR-1 in animals and human beings in China: a microbiological and molecular biological  
394 study. *The Lancet Infectious diseases* 2016; **16**: 161-8.
- 395 35. Oteo J, Hernandez JM, Espasa M et al. Emergence of OXA-48-producing *Klebsiella*  
396 *pneumoniae* and the novel carbapenemases OXA-244 and OXA-245 in Spain. *The Journal of*  
397 *antimicrobial chemotherapy* 2013; **68**: 317-21.

398 36. Turton JF, Doumith M, Hopkins KL et al. Clonal expansion of *Escherichia coli* ST38 carrying a  
399 chromosomally integrated OXA-48 carbapenemase gene. *Journal of medical microbiology* 2016; **65**:  
400 538-46.  
401

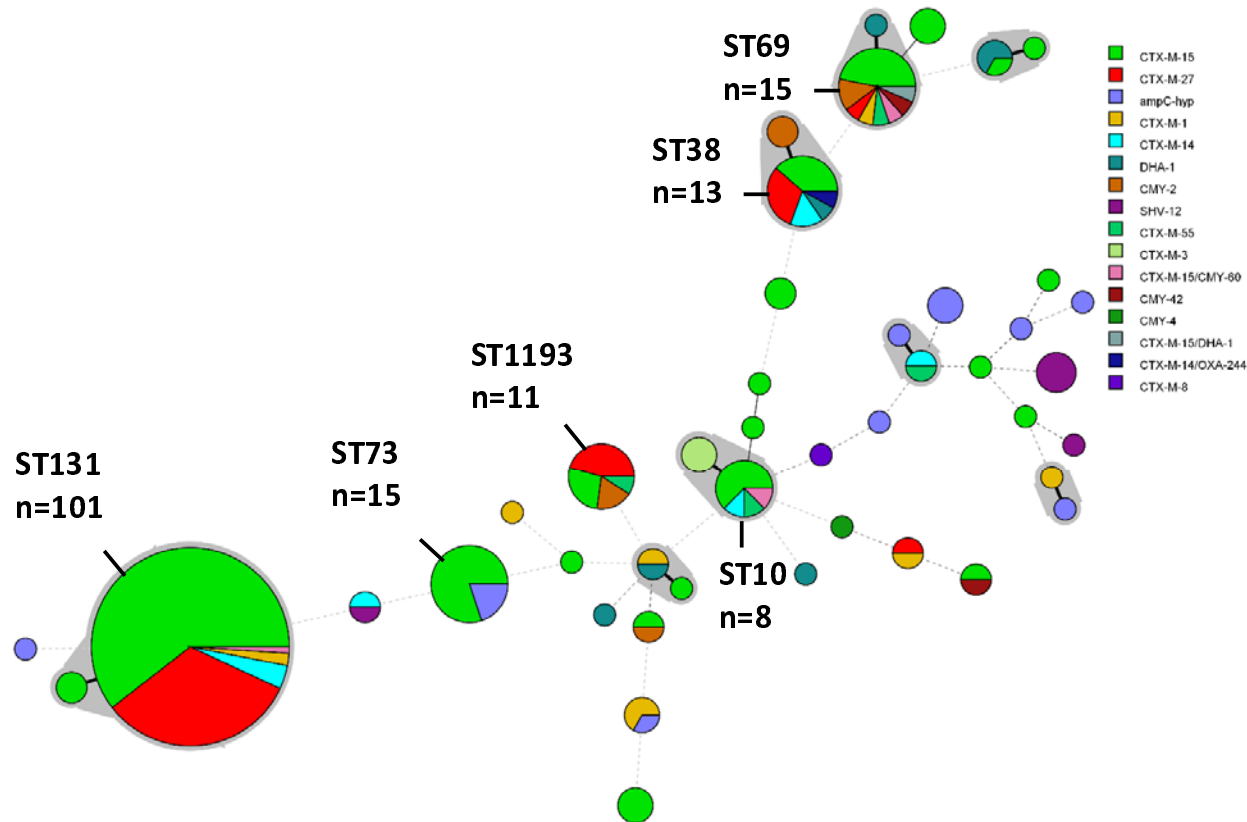

403

404 **Figure 1.** Minimum spanning tree of the MLST profiles of 225 CTX-R *E. coli* isolates. The shaded areas represent single locus variants (SLVs).  
 405 Members of the most prevalent STs (>4 representatives) are labelled and their number of representatives indicated. The diameter of the circle  
 406 represents the number of isolates of that particular ST and the coloured segments indicate which CTX-R mechanisms were identified. Thick  
 407 solid lines represent SLVs, thin solid lines represent double-locus variants and dashed connecting lines indicate multilocus variants.



408

| Isolates (M/F)   | CTX-R mechanisms identified by PCR |          |          |          |            |          |           |           |          |           |
|------------------|------------------------------------|----------|----------|----------|------------|----------|-----------|-----------|----------|-----------|
|                  | CTX-M                              | CTX-M    | CTX-M    | CTX-M    | CTX-M      | CTX-M    | CMY       | DHA       | SHV      | None      |
|                  | G1                                 | G1 + DHA | G1 + SHV | G1 + CMY | G9         | G8       |           |           |          |           |
| F (n=507)        | 334                                | 3        | 1        | 2        | 123        | 1        | 6         | 11        | 6        | 20        |
| M (n=119)        | 77                                 | 1        | 2        | 1        | 26         | 0        | 4         | 2         | 2        | 4         |
| <b>Total 626</b> | <b>411</b>                         | <b>4</b> | <b>3</b> | <b>3</b> | <b>149</b> | <b>1</b> | <b>10</b> | <b>13</b> | <b>8</b> | <b>24</b> |

409

410 **Table 1.** Beta-lactamase genes detected by multiplex PCRs on 626 CTX-R isolates.

| <i>bla</i> <sub>CTX-M</sub> variant |          |          |           |            |           |          | <i>bla</i> <sub>CMY</sub> variant |          |          |          | <i>bla</i> <sub>DHA</sub> variant | <i>bla</i> <sub>SHV</sub> variant | None detected |
|-------------------------------------|----------|----------|-----------|------------|-----------|----------|-----------------------------------|----------|----------|----------|-----------------------------------|-----------------------------------|---------------|
| CTX-M-1                             | CTX-M-3  | CTX-M-8  | CTX-M-14  | CTX-M-15   | CTX-M-27  | CTX-M-55 | CMY-2                             | CMY-4    | CMY-42   | CMY-60   | DHA-1                             | SHV-12                            | NA            |
| <b>9</b>                            | <b>3</b> | <b>1</b> | <b>10</b> | <b>118</b> | <b>44</b> | <b>4</b> | <b>7</b>                          | <b>1</b> | <b>2</b> | <b>3</b> | <b>8</b>                          | <b>6</b>                          | <b>13</b>     |

411

412 **Table 2.** ESBL/pAmpC variants identified in the 225 isolates subjected to WGS.

413 Note: 3 isolates harboured both *bla*<sub>CMY-60</sub> and *bla*<sub>CTX-M-15</sub>, and one isolate harboured *bla*<sub>DHA-1</sub> and *bla*<sub>CTX-M-15</sub>.

414

| No. of isolates | <i>ampC</i> promoter/attenuator mutations | Pribnow box            |
|-----------------|-------------------------------------------|------------------------|
| 8               | -42C>T, -25G>A, -1C>T, +57C>T             | TTGACA - 17nt - TATCGT |
| 2               | -28G>A, ins -12 T -13, +22G>T             | TTGTCA - 17nt - TACAAT |
| 2               | -11C>T, ins -12 T -13, +33G>A, +36G>A     | TTGTCA - 17nt - TATAAT |
| 1               | -32T>A, +34C>A, +57C>T                    | TTGACA - 16nt - TACAAT |

415

416 **Table 3.** Mutations found within promoter/attenuator region of the 13 presumed AmpC-hyperproducing isolates subjected to WGS relative to *E. coli* MG1655 (Genbank Accession Number NC\_000913.3).

418

419

420

| ST131 Clades (no.) |         | CTX-R Alleles |          |                 |          |                |
|--------------------|---------|---------------|----------|-----------------|----------|----------------|
|                    |         | CTX-M-1       | CTX-M-14 | CTX-M-15        | CTX-M-27 | CMY-60         |
| A                  | 11      | 1             | 1        | 4               | 5        |                |
| B                  | 1       | 1             |          |                 |          |                |
| C                  | C1-M27  |               |          |                 | 23       |                |
|                    | C1-nM27 | 5             | 3        |                 | 2        |                |
|                    | C2      | 54            |          | 54              |          |                |
| Unclassified       | 7       |               |          | 4 <sup>1</sup>  | 3        | 1 <sup>1</sup> |
| Total              | 101     | 2             | 4        | 62 <sup>1</sup> | 33       | 1 <sup>1</sup> |

421

422 **Table 4.** ST131 clades and CTX-R GOI alleles harboured by 101 isolates subject to WGS.

423 <sup>1</sup> One isolate belonging to an ST131 unclassified clade harboured both *bla*<sub>CTX-M-15</sub> and *bla*<sub>CMY-60</sub>.

424 **Supplementary Data**

425

| Primer        | Sequence (5'-3')      | Product size (bp) | Reference   |
|---------------|-----------------------|-------------------|-------------|
| CTX-M-G1F     | AAAAATCACTGCGCCAGTTC  | 415               |             |
| CTX-M-G1R     | AGCTTATTCATCGCCACGTT  |                   |             |
| CTX-M-G2F     | CGACGCTACCCCTGCTATT   | 552               |             |
| CTX-M-G2R     | CCAGCGTCAGATTTTTTCAGG |                   |             |
| CTX-M-G8F     | TCGCGTTAAGCGGATGATGC  | 666               | 20          |
| CTX-M-G9F     | CAAAGAGAGTGCAACGGATG  | 205               |             |
| CTX-M-G9R     | ATTGGAAAGCGTTCATCACC  |                   |             |
| CTX-M-G25F    | GCACGATGACATTCGGG     | 327               |             |
| CTX-M-G8/25R  | AACCCACGATGTGGGTAGC   |                   |             |
| CMY-F         | CGATCCGGTCACGAAATACT  | 556               |             |
| CMY-R         | CCAGCCTAATCCCTGGTACA  |                   |             |
| DHA-F         | GTGAAATCCGCCTCAAAGA   | 341               |             |
| DHA-R         | ACAATCGCCACCTGTTTTTC  |                   |             |
| OXA-1-F       | TTATCTACAGCAGCGCCAGT  | 451               | This study. |
| OXA-1-R       | AAGCTACTTTTCGAGCCATGC |                   |             |
| SHV-F         | CTTTCCCATGATGAGCACCT  | 127               |             |
| SHV-R         | GCGAGTAGTCCACCAGATCC  |                   |             |
| TEM-F         | CCGAAGAACGTTTTCCAATG  | 249               |             |
| TEM-R         | GTCCTCCGATCGTTGTCAGAA |                   |             |
| MCR-1_F       | TGTTCTTGTGGCGAGTGTTG  | 468               |             |
| MCR-1_R       | ACAGGCAGTAAAATCAGCGC  |                   | This study. |
| OXA-48-like_F | TCGATTTGGGCGTGGTTAAG  | 505               |             |
| OXA-48-like_R | AGCCCTAAACCATCCGATGT  |                   |             |

426

427 **Table S1.** Primers used in this study.

428

429

430

431

432

433

434

435

436

437

438

439

440

441

442

| STs<br>(no. if >1) | Beta-lactamase GOIs/mechanism identified (no.)                                                         |
|--------------------|--------------------------------------------------------------------------------------------------------|
| 131 (101)          | CTX-M-15 (62), CTX-M-27 (33), CTX-M-14 (4), CTX-M-1 (2), CMY-60 <sup>1</sup>                           |
| 69 (15)            | CTX-M-15 (9), CTX-M-1, CTX-M-27, CTX-M-55, DHA-1 <sup>2</sup> , CMY-2 (2), CMY-42, CMY-60 <sup>3</sup> |
| 73 (15)            | CTX-M-15 (12), AmpC-hyp (3)                                                                            |
| 38 (13)            | CTX-M-15 (5), CTX-M-27 (4), CTX-M-14 (3), DHA-1, OXA-244 <sup>4</sup>                                  |
| 1193 (11)          | CTX-M-27 (5), CTX-M-15 (3), CMY-2 (2), CTX-M-55                                                        |
| 10 (8)             | CTX-M-15 (6), CTX-M-55, CMY-60 <sup>5</sup> , CTX-M-14                                                 |
| 359 (4)            | SHV-12 (4)                                                                                             |
| 141 (3)            | CTX-M-1 (2), AmpC-hyp                                                                                  |
| 200 (3)            | AmpC-hyp (3)                                                                                           |
| 209 (3)            | CTX-M-3 (3)                                                                                            |
| 349 (3)            | DHA-1 (2), CTX-M-15                                                                                    |
| 394 (3)            | CTX-M-15 (3)                                                                                           |
| 636 (3)            | CTX-M-15 (3)                                                                                           |
| 12 (2)             | CTX-M-14, SHV-12                                                                                       |
| 58 (2)             | CTX-M-14, CTX-M-55                                                                                     |
| 80 (2)             | CTX-M-15, CMY-2                                                                                        |
| 127 (2)            | CTX-M-1, DHA-1                                                                                         |
| 405 (2)            | CTX-M-15 (2)                                                                                           |
| 648 (2)            | CTX-M-15, CMY-42                                                                                       |
| 963 (2)            | CMY-2 (2)                                                                                              |
| 1722 (2)           | CTX-M-1, CTX-M-27                                                                                      |
| 8313 (2)           | CTX-M-15 (2)                                                                                           |
| 23                 | CTX-M-1                                                                                                |
| 54                 | AmpC-hyp                                                                                               |
| 75                 | AmpC-hyp                                                                                               |
| 88                 | AmpC-hyp                                                                                               |
| 95                 | CTX-M-15                                                                                               |
| 155                | AmpC-hyp                                                                                               |
| 162                | SHV-12                                                                                                 |
| 224                | CTX-M-15                                                                                               |
| 428                | AmpC-hyp                                                                                               |
| 443                | CTX-M-15                                                                                               |
| 448                | AmpC-hyp                                                                                               |
| 457                | CMY-4                                                                                                  |
| 491                | DHA-1                                                                                                  |
| 540                | CTX-M-8                                                                                                |
| 1431               | CTX-M-15                                                                                               |
| 2015               | CTX-M-1                                                                                                |
| 2914               | CTX-M-15                                                                                               |
| 3036               | DHA-1                                                                                                  |
| 4981               | CTX-M-15                                                                                               |
| 7401               | DHA-1                                                                                                  |
| 8312               | CTX-M-15                                                                                               |
| 8467               | CTX-M-15                                                                                               |

443

444 **Table S2.** The STs and CTX-R mechanisms identified in 225 isolates subjected to WGS.

445 <sup>1</sup> – CMY-60 harboured alongside CTX-M-15.

446 <sup>2</sup> – DHA-1 harboured alongside CTX-M-15.

447 <sup>3</sup> – CMY-60 harboured alongside CTX-M-15.

448 <sup>4</sup> – OXA-244 harboured alongside CTX-M-14.

449 <sup>5</sup> – CMY-60 harboured alongside CTX-M-15.
